# Supplementary material for: Tuning optical properties of perovskite nanocrystals by supermolecular mercapto-β-cyclodextrin
Source: Royal Society of Chemistry journal article supplement (doi:10.1039/c6cc04908g), 2016-01-01
Supplement: c6cc04908g1.pdf [file c6cc04908g1.pdf]

## Electronic Supplementary Information

### Tuning optical properties of perovskite nanocrystals by supermolecular mercapto- $\beta$ -cyclodextrin

Qi-Le Li<sup>a</sup>, Wen-Xiu Lu<sup>a</sup>, Neng Wan<sup>b</sup> and Shou-Nian Ding<sup>a\*</sup>

<sup>a</sup>*Jiangsu Province Hi-Tech Key Laboratory for Bio-medical Research, School of Chemistry and Chemical Engineering, Southeast University, Nanjing 211189, China.*

<sup>b</sup>*SEU-FEI Nano-Pico Center, Key Laboratory of MEMS of Ministry of Education, School of Electrical Science and Engineering, Southeast University, 210096 Nanjing, China*

\*E-mail: snding@seu.edu.cn

## Experimental Section

### Reagents and Chemicals

Cs<sub>2</sub>CO<sub>3</sub> and PbBr<sub>2</sub> were obtained from Sinopharm Chemical Reagent Co., Ltd (Shanghai, China). Octadecene (90%) and Oleic acid (OA, 90%) were purchased from Sigma-Aldrich Co. (St. Louis, MO, USA). Oleylamine (OLA, 80-90%) were purchased from Acros Organics (Belgium). Thiolated  $\beta$ -cyclodextrins (SH- $\beta$ -CD) was purchased from Shandong BinzhouZhiyuan Biotechnology Co., Ltd (Binzhou, China). All other reagents were of analytical reagent grade and used without further purification.

### Synthesis of CsPbBr<sub>3</sub> NCs

Synthesis of CsPbBr<sub>3</sub> NCs from Cs<sub>2</sub>CO<sub>3</sub> and PbBr<sub>2</sub> followed literature previously reported by Protesescu.<sup>1</sup> Cs<sub>2</sub>CO<sub>3</sub> (0.407g,) was added into 50 mL 3-neck flask along with octadecene (20mL) and OA (1.25 mL), and then heated under N<sub>2</sub> to 150 °C until all Cs<sub>2</sub>CO<sub>3</sub> dissolved. The Cs-oleate precursor solution was kept at 100 °C to prevent precipitation before injection. In another 50 mL 3-neck flask, ODE (5 mL) and PbBr<sub>2</sub> (0.188 mmol 0.069g), were dried under N<sub>2</sub> for 1h at 130 °C. 0.5 hour later, OLA (0.5 mL) and OA (0.5 mL) were

injected into the mixture. The temperature was changed to 150 °C after complete solubilisation of the PbBr<sub>2</sub>. And then hot Cs-oleate solution (0.4 mL) was injected quickly and the reaction mixture was immediately cooled by the ice-water bath 5s later. The obtained CsPbBr<sub>3</sub> NCs could be purified by centrifugation at high speed (10000 rpm 25 min), and then redispersion in toluene.

### **CsPbBr<sub>3</sub> NCs treated by SH-β-CD**

0.5 mL of crude CsPbBr<sub>3</sub> NCs were dispersed in 5 mL of toluene, and different quantities (normally ranging from 0 to 8 mg) of SH-β-CD was added in the above colloidal solution.

### **Transmission Electron Microscopy (TEM)**

TEM observations were conducted on a JEM-2100 transmission electron microscope (JEOL Ltd.) with a thermionic gun operating at 200 kV of accelerating voltage. The encapsulated CsPbBr<sub>3</sub> NCs@SH-β-CD with different quantities SH-β-CD (0, 4, and 8 mg) were diluted in toluene and then dropping onto carbon-coated 200 mesh copper grids with subsequent solvent evaporation.

### **Spectroscopy Characterization**

The UV-vis spectra were taken on a Shimadzu UV-2450 spectrophotometer (Tokyo, Japan) and the fluorescence (FL) measurements were performed by a Fluoromax-4 fluorescence spectrofluorometer (Horiba, USA). The encapsulated CsPbBr<sub>3</sub> NCs@SH-β-CD with different quantities SH-β-CD (ranging from 0, 2, 4, 6 and 8 mg) were diluted in toluene (50 μL in 1 mL), in 1 cm path length quartz cuvettes. The FT-IR spectrum of SH-β-CD, CsPbBr<sub>3</sub> NCs and CsPbBr<sub>3</sub>@SH-β-CD NCs were obtained from a Nicolet 5700 (USA) IR spectrometer in the range of 400–4000 cm<sup>-1</sup>. Fluorescence lifetime were measured with Fluorolog 3-TSCPC. (Horiba Jobin Yvon Inc., France)

### **Photoluminescence quantum yield (PLQY) measurements**

The absolute value of the PLQY was measured with Fluorolog 3-TSCPC. (Horiba Jobin Yvon Inc., France) Use of an integrating sphere with a short-pass filter allowed us to simultaneously measure absorbance corrected to reflectance and scattering losses. The encapsulated CsPbBr<sub>3</sub> NCs@SH-β-CD with different quantities SH-β-CD were diluted in toluene (50 μL in 1 mL), in 1 cm path length quartz cuvettes.

### X-ray powder diffraction (XRD)

The XRD analysis was performed on Ultima IV multipurpose X-ray diffraction system using Copper X-ray tube (standard) radiation at a voltage of 40 kV and 40 mA, and X'Celerator RTMS detector. The diffraction pattern was scanned over the angular range of 10-60 degree (2θ) with a step size of 0.02, at room temperature.

### Thermogravimetry analysis (TGA)

The TGA was carried out using a Mettler Toledo STARe System with an operative temperature range 25-1100 °C and 0.1 microgram sensitivity. The samples were heated from 50 to 800 °C, with an increase of 5 °C/min and under nitrogen flux of 40 mL/min.

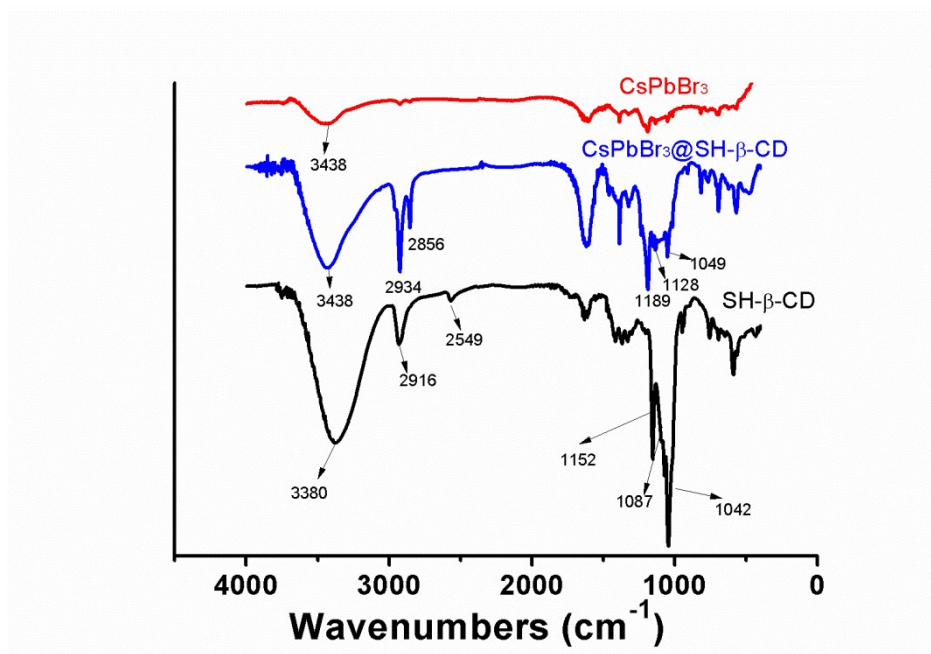

**Figure S1.** Fourier transform infrared (FT-IR) spectrum of CsPbBr<sub>3</sub> NCs (Red Line), SH-β-CD (Black Line), CsPbBr<sub>3</sub>@SH-β-CD (blue Line), respectively.

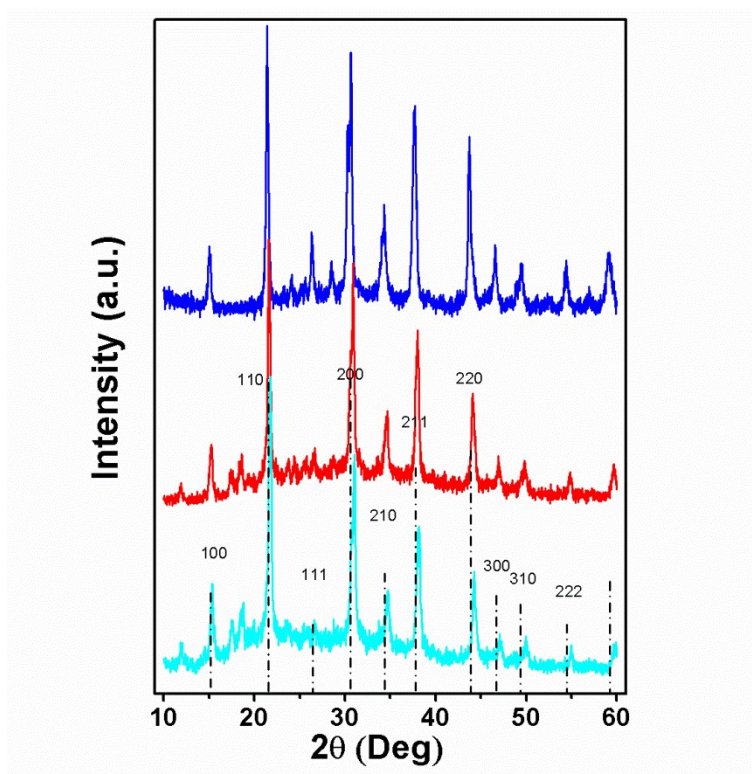

**Figure S2.** X-ray diffraction patterns for CsPbBr<sub>3</sub> NCs (blue Line), partially (red Line) and fully SH- $\beta$ -CDs encapsulated CsPbBr<sub>3</sub> (cyan Line), respectively.

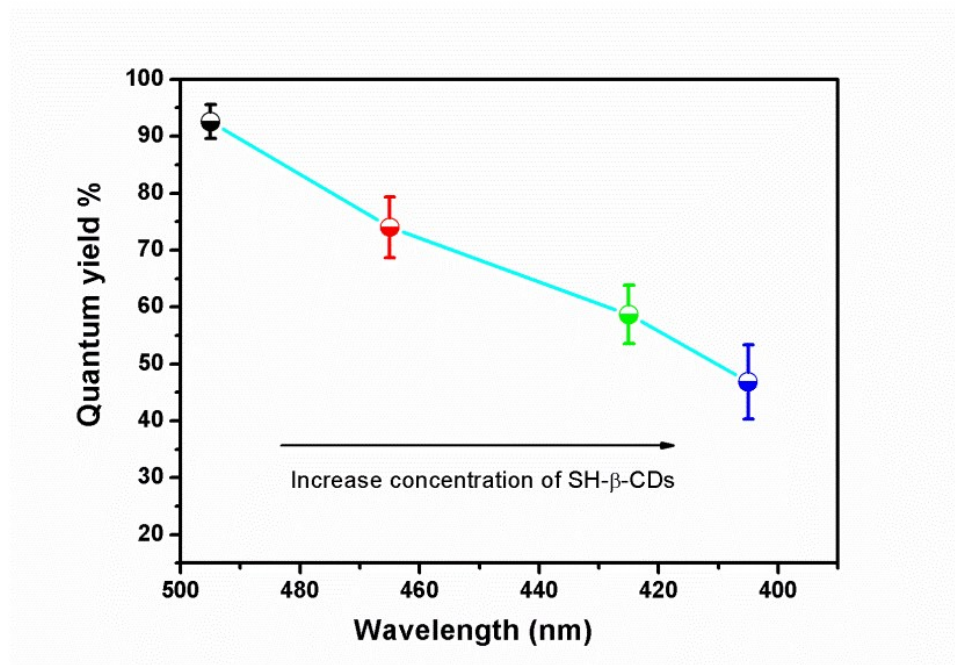

**Figure S3.** PLQY recorded on the encapsulated CsPbBr<sub>3</sub> NCs with different concentration of SH- $\beta$ -CDs.

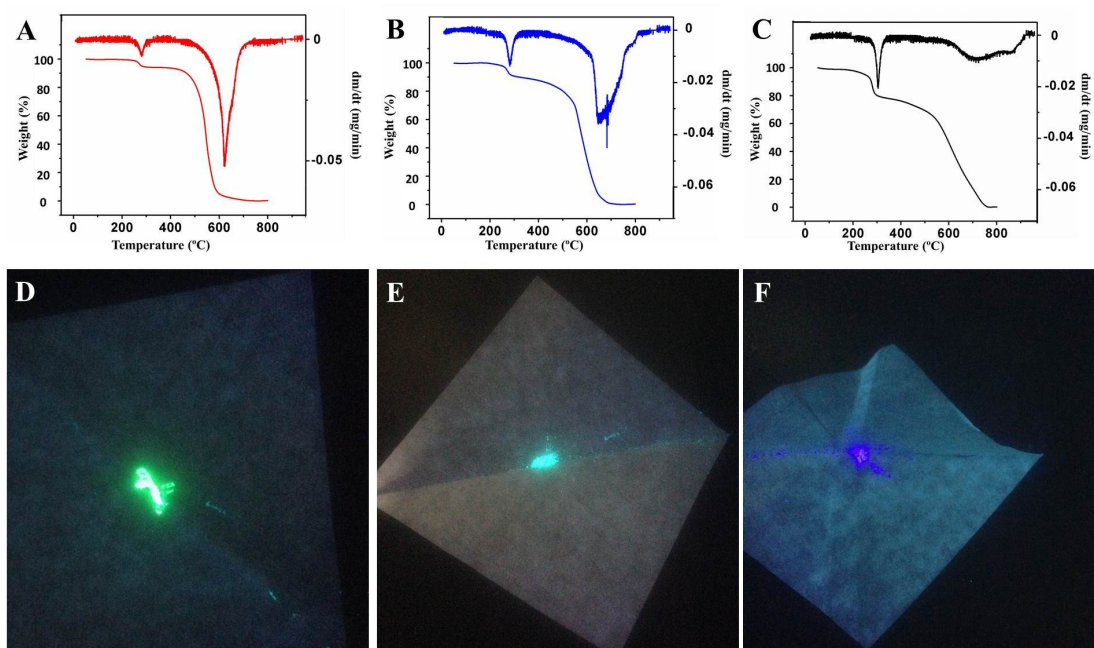

**Figure S4.** TGA heating curves and the corresponding 1st derivatives curves of CsPbBr<sub>3</sub> NCs (A), partially (B) and fully SH-β-CDs (C) encapsulated CsPbBr<sub>3</sub> NCs powders and photographs of CsPbBr<sub>3</sub> NCs (D), partially (E) and fully SH-β-CDs (F) encapsulated CsPbBr<sub>3</sub> NCs powders under UV lamp,  $\lambda = 365$  nm.

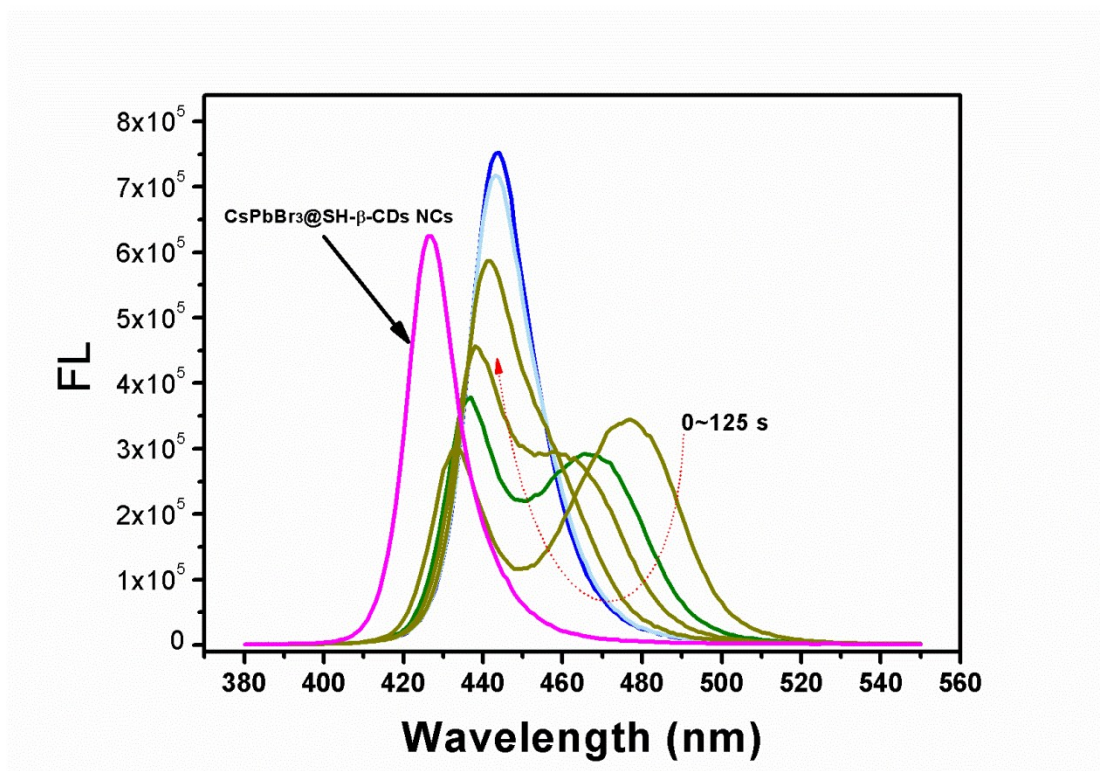

**Figure S5.** Time-dependent (0, 25, 50, 75, 100, 125 s) PL spectra showing an intermediate stage formed during inter-NCs homogenization after injecting pristine CsPbBr<sub>3</sub> NCs into the encapsulated CsPbBr<sub>3</sub>@SH-β-CDs NCs.

## References

1. L. Protesescu, S. Yakunin, M. I. Bodnarchuk, F. Krieg, R. Caputo, C. H. Hendon, R. X. Yang, A. Walsh and M. V. Kovalenko, *Nano. Lett.*, 2015, **15**, 3692-3696.
